# Supplementary material for: Accurate prediction of grain boundary structures and energetics in CdTe: a machine-learning potential approach
Source: Royal Society of Chemistry journal article supplement (doi:10.1039/d1cp04329c), 2021-12-21
Supplement: d1cp04329c1.pdf [file d1cp04329c1.pdf]

## Supporting Information

### Accurate prediction of grain boundary structures and energetics in CdTe: A machine-learning potential approach

Tatsuya Yokoi,<sup>a\*</sup> Kosuke Adachi<sup>a</sup>, Sayuri Iwase<sup>a</sup>, Katsuyuki Matsunaga<sup>a,b</sup>

<sup>a</sup>*Department of Materials Physics, Nagoya University, Nagoya 464-8603, Japan*

<sup>b</sup>*Nanostructures Research Laboratory, Japan Fine Ceramics Center, Nagoya, 456-8587, Japan*

#### Determination of hyperparameters for ANN potential

Tables S1 and S2 summarize the hyperparameters used for two- and three-body symmetry functions, respectively. These values and the total number of symmetry functions were empirically determined so as to distinguish different atomic environments, as well as different elements, with sufficient accuracy.

To find an appropriate cutoff radius for the symmetry functions ( $R_c$ ), five artificial-neural-network (ANN) potentials were trained using five  $R_c$  values, 6, 7, 8, 9 and 10 Å. In this test calculation, the  $66 \times 33 \times 33 \times 1$  architecture was used. Single-crystal structures were used as references for a training dataset. This dataset also included vacancies. To cover a wide range of atomic environments, various initial structures were generated by randomly changing their atomic positions and cell dimensions of reference structures. Using the generated structures, total energies and atomic forces were obtained by performing DFT single-point calculations and DFT structural relaxations. Totally, 7990 energies and 112800 atomic forces were used to train the ANN potentials. Table S3 list the MAE values for these ANN potentials. It is found that for  $R_c = 7$  Å, the ANN potential shows the lowest MAE values of 2.16 meV/atom and 20.73 meV/Å for the total energies and atomic forces, respectively, MAE values are also found to increase with increasing  $R_c$ . Thus  $R_c$  was finally chosen to be 7 Å.

In addition, an appropriate number of nodes was also examined by constructing three ANN potentials:  $66 \times 44 \times 44 \times 1$ ,  $66 \times 55 \times 55 \times 1$  and  $66 \times 66 \times 66 \times 1$  architectures. In this test calculation,  $R_c = 7$  Å was used. As a training dataset, single-crystal, surfaces ((001), (110), (111), (112) and (310) planes),  $\Sigma 3(112)$  GBs were used as reference structures. Their initial structures were generated in the same way as that mentioned above. In this case, single-point calculations and structural relaxations were performed using DFT calculations to obtain total energies and atomic forces. Totally, 10750 energies and 522810 atomic forces were used to train the ANN potentials. Table S4 summarizes the MAE values for the three ANN potential. The  $66 \times 66 \times 66 \times 1$  architecture is found to provide the lowest value of 4.10 meV/atom and 39.43 meV/Å for the total energies and atomic forces, respectively. More nodes in the hidden layers may decrease MAE values in the training dataset, but the difference between the MAEs of the 66

$\times 55 \times 55 \times 1$  and  $66 \times 66 \times 66 \times 1$  architectures is small. Thus considering the trade-off between the accuracy and computational cost, the  $66 \times 66 \times 66 \times 1$  architecture was finally used in the main calculation.

Table S1. Hyperparameters ( $\eta$  and  $R_s$ ) of two-body symmetry functions,  $G_i^2$  ( $i = 1, 2, \dots, 18$ ).

| No. | Two-body pair | $\eta$ | $R_s$ |
|-----|---------------|--------|-------|
| 1   | Cd-Cd         | 0.0010 | 0.000 |
| 2   |               | 0.0050 | 0.200 |
| 3   |               | 0.0100 | 0.500 |
| 4   |               | 0.0500 | 1.000 |
| 5   |               | 0.1000 | 1.400 |
| 6   |               | 0.1500 | 1.800 |
| 7   | Te-Te         | 0.0030 | 0.100 |
| 8   |               | 0.0070 | 0.300 |
| 9   |               | 0.0300 | 0.700 |
| 10  |               | 0.0700 | 1.300 |
| 11  |               | 0.1300 | 1.700 |
| 12  |               | 0.1700 | 2.100 |
| 13  | Cd-Te         | 0.0020 | 0.050 |
| 14  |               | 0.0060 | 0.250 |
| 15  |               | 0.0200 | 0.600 |
| 16  |               | 0.0600 | 1.150 |
| 17  |               | 0.1150 | 1.550 |
| 18  |               | 0.1600 | 1.950 |

Table S2. Hyperparameters ( $\eta$ ,  $\varphi$  and  $\zeta$ ) for three-body symmetry functions,  $G_i^3$  ( $i = 19, 20, \dots, 66$ ).

| No. | Three-body pair | $\eta$ | $\varphi$ | $\zeta$ |
|-----|-----------------|--------|-----------|---------|
| 19  | Gd-Gd-Gd        | 0.0400 | 0.000     | 1.000   |
| 20  |                 | 0.0600 | 0.000     | 1.500   |
| 21  |                 | 0.0800 | 0.000     | 1.000   |
| 22  |                 | 0.1200 | 0.000     | 1.500   |
| 23  |                 | 0.1600 | 0.000     | 1.000   |
| 24  |                 | 0.2000 | 0.000     | 1.500   |

|    |          |        |         |       |
|----|----------|--------|---------|-------|
| 25 |          | 0.0400 | 180.000 | 1.000 |
| 26 |          | 0.0600 | 180.000 | 1.500 |
| 27 |          | 0.0800 | 180.000 | 1.000 |
| 28 |          | 0.1200 | 180.000 | 1.500 |
| 29 |          | 0.1600 | 180.000 | 1.000 |
| 30 |          | 0.2000 | 180.000 | 1.500 |
| 31 |          | 0.0500 | 30.000  | 1.300 |
| 32 |          | 0.0700 | 30.000  | 1.700 |
| 33 |          | 0.0900 | 30.000  | 1.300 |
| 34 |          | 0.1500 | 30.000  | 1.700 |
| 35 |          | 0.1900 | 30.000  | 1.300 |
| 36 |          | 0.2300 | 30.000  | 1.700 |
| 37 | Te-Te-Te | 0.0500 | 120.000 | 1.300 |
| 38 |          | 0.0700 | 120.000 | 1.700 |
| 39 |          | 0.0900 | 120.000 | 1.300 |
| 40 |          | 0.1500 | 120.000 | 1.700 |
| 41 |          | 0.1900 | 120.000 | 1.300 |
| 42 |          | 0.2300 | 120.000 | 1.700 |
| 43 |          | 0.0466 | 20.000  | 1.200 |
| 44 |          | 0.0666 | 20.000  | 1.633 |
| 45 |          | 0.0866 | 20.000  | 1.200 |
| 46 |          | 0.1400 | 20.000  | 1.633 |
| 47 |          | 0.1800 | 20.000  | 1.200 |
| 48 |          | 0.2200 | 20.000  | 1.633 |
| 49 | Cd-Te-Te | 0.0466 | 140.000 | 1.200 |
| 50 |          | 0.0666 | 140.000 | 1.633 |
| 51 |          | 0.0866 | 140.000 | 1.200 |
| 52 |          | 0.1400 | 140.000 | 1.633 |
| 53 |          | 0.1800 | 140.000 | 1.200 |
| 54 |          | 0.2200 | 140.000 | 1.633 |
| 55 |          | 0.0433 | 10.000  | 1.100 |
| 56 |          | 0.0633 | 10.000  | 1.566 |
| 57 |          | 0.0833 | 10.000  | 1.100 |
| 58 | Cd-Cd-Te | 0.1300 | 10.000  | 1.566 |
| 59 |          | 0.1700 | 10.000  | 1.100 |
| 60 |          | 0.2100 | 10.000  | 1.566 |

|    |        |         |       |
|----|--------|---------|-------|
| 61 | 0.0433 | 160.000 | 1.100 |
| 62 | 0.0633 | 160.000 | 1.566 |
| 63 | 0.0833 | 160.000 | 1.100 |
| 64 | 0.1300 | 160.000 | 1.566 |
| 65 | 0.1700 | 160.000 | 1.100 |
| 66 | 0.2100 | 160.000 | 1.566 |

Table S3. MAE values of the total energies and atomic forces for  $R_c$  values of 6, 7, 8, 9 and 10 Å.

| $R_c$ [Å] | MAE               |                      |
|-----------|-------------------|----------------------|
|           | Energy [meV/atom] | Atomic force [meV/Å] |
| 6         | 2.37              | 23.63                |
| 7         | 2.16              | 20.73                |
| 8         | 2.21              | 23.24                |
| 9         | 2.51              | 26.67                |
| 10        | 2.92              | 30.76                |

Table S4. MAE values of the total energies and atomic forces for the  $66 \times 55 \times 55 \times 1$  and  $66 \times 66 \times 66 \times 1$  architectures.

| Architecture                      | MAE               |                      |
|-----------------------------------|-------------------|----------------------|
|                                   | Energy [meV/atom] | Atomic force [meV/Å] |
| $66 \times 44 \times 44 \times 1$ | 4.39              | 41.17                |
| $66 \times 55 \times 55 \times 1$ | 4.30              | 40.34                |
| $66 \times 66 \times 66 \times 1$ | 4.10              | 39.43                |

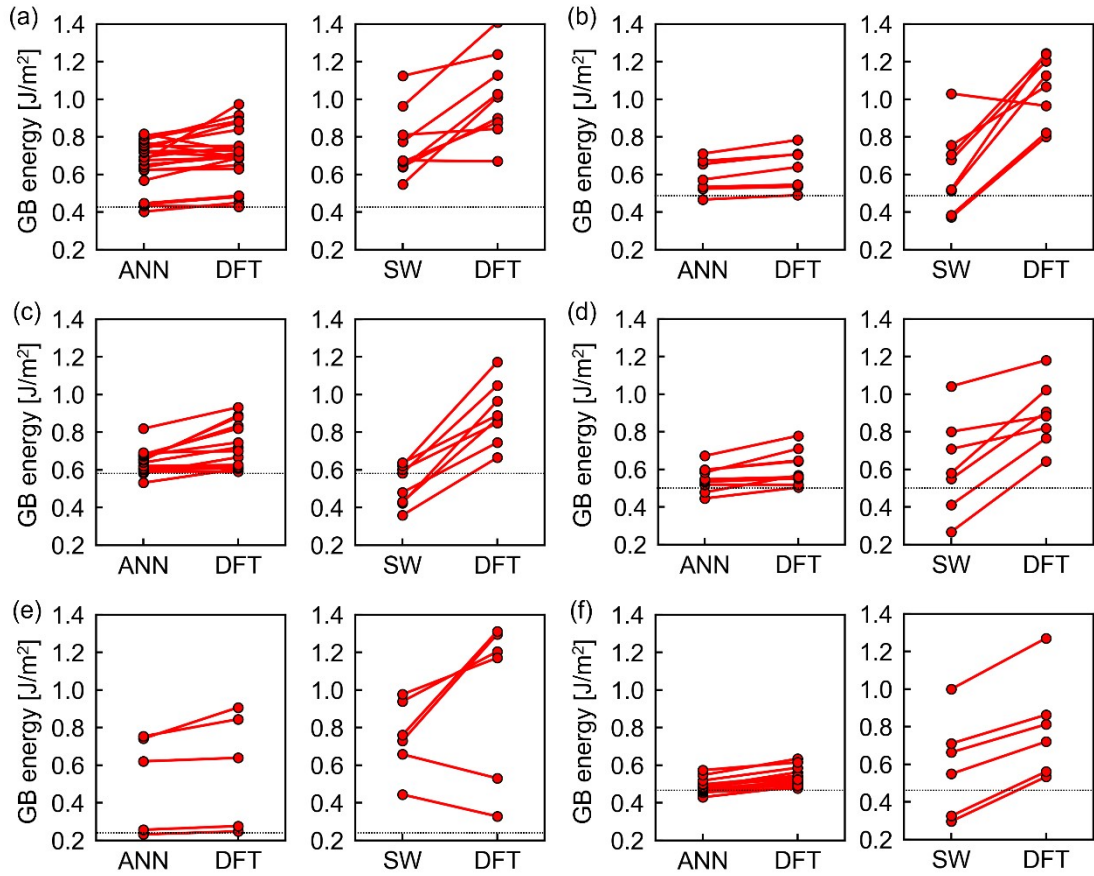

Figure S1. Comparison of GB energies of the ANN and SW potentials with DFT values for (a) the  $\Sigma 3(112)/[112]$ , (b)  $\Sigma 5(210)/[001]$ , (c)  $\Sigma 5(310)/[001]$ , (d)  $\Sigma 9(221)/[221]$ , (e)  $\Sigma 11(113)/[113]$ , (f)  $\Sigma 11(332)/[332]$  GBs. The dashed line indicates the lowest DFT GB energy of the GB structure predicted by the ANN potential. Note that for the  $\Sigma 3(111)/[111]$  GB, the lowest-energy structure shows a GB energy of  $\sim 0.01$  J/m<sup>2</sup> for both the ANN and SW potential. Additionally, high-energy structures are absent in both cases. Thus their results are not shown in this figure.
